# Supplementary material
Source: PubMed Central journal article supplement (PMC11292729)
Supplement: NIHMS1573860-supplement-Supplement.pdf [file NIHMS1573860-supplement-Supplement.pdf]

## Identification of ezetimibe and pranlukast as pharmacological chaperones for treatment of the rare disease Mucopolysaccharidosis type IVA

Carlos J. Alméciga-Díaz<sup>1,\*</sup>, Oscar A. Hidalgo<sup>1</sup>, Sergio Olarte-Avellaneda<sup>1,2</sup>, Alexander Rodríguez-López<sup>1,3</sup>, Esteban Guzman<sup>1</sup>, Rafael Garzón<sup>1</sup>, Luisa Natalia Pimentel-Vera<sup>1</sup>, María Alejandra Puentes-Tellez<sup>1</sup>, Andrés Felipe Rojas-Rodríguez<sup>4</sup>, Kirill Gorshkov<sup>5</sup>, Rong Li<sup>5</sup>, Wei Zheng<sup>5</sup>

<sup>1</sup> Institute for the Study of Inborn Errors of Metabolism, Faculty of Science, Pontificia Universidad Javeriana, Bogotá D.C., 110231, Colombia

<sup>2</sup> Pharmacy Department, Faculty of Science, Universidad Nacional de Colombia, Bogotá D.C., 111321, Colombia

<sup>3</sup> Chemistry Department, Faculty of Science, Pontificia Universidad Javeriana, Bogotá D.C., 110231, Colombia

<sup>4</sup> Computational and Structural Biochemistry, Departamento de Nutrición y Bioquímica, Faculty of Science, Pontificia Universidad Javeriana, Bogotá D.C., 110231, Colombia

<sup>5</sup> National Center for Advancing Translational Sciences, National Institutes of Health, Bethesda, MD, 20892, USA

\* Corresponding author:

**Carlos J. Alméciga-Díaz**, Institute for the Study of Inborn Errors of Metabolism, Pontificia Universidad Javeriana, Cra. 7 No. 43-82 Building 54, Room 305A. Bogotá D.C., 110231, Colombia. Tel: +57-1 3208320 Ext 4140; Fax: +57-1 3208320 Ext 4099; E-mail: [cjalmechiga@javeriana.edu.co](mailto:cjalmechiga@javeriana.edu.co).

**Wei Zheng, Ph.D.** National Center for Advancing Translational Sciences, National Institutes of Health, 9800 Medical Center Drive, Bethesda, MD, 20892. Tel.: 1-301-827-5722, Email: [wzheng@mail.nih.gov](mailto:wzheng@mail.nih.gov)

**Table S1.** Top 20 hits of the compounds interacting with GALNS after virtual screening against the ZINC In Man subset from ZINC.

| Rank | ZINC ID      | Name / Structure                                                                                                                                                                  | Molecular Weight (g/mol) | Affinity energy (kcal/mol) | Target                                                                                                                                                                                                                                                 | Indication                                               |
|------|--------------|-----------------------------------------------------------------------------------------------------------------------------------------------------------------------------------|--------------------------|----------------------------|--------------------------------------------------------------------------------------------------------------------------------------------------------------------------------------------------------------------------------------------------------|----------------------------------------------------------|
| 1    | ZINC13831338 | Anilinopyrimidine 1<br>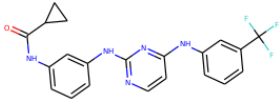                                                                          | 413.4                    | -9.9                       | <ul style="list-style-type: none"> <li>Tyrosine-protein kinase JAK1</li> <li>Mitogen-activated protein kinase 10</li> <li>Mitogen-activated protein kinase 8</li> <li>Tyrosine-protein kinase ABL1</li> <li>Glycogen synthase kinase-3 beta</li> </ul> | Fungicide                                                |
| 2    | ZINC04026871 | 13-methyl-3-oxo-2,6,7,8,9,10,11,12,14,15,16,17-dodecahydro-1H-cyclopenta[a]phenanthren-17-yl<br> | 406.5                    | -9.8                       | <ul style="list-style-type: none"> <li>Sex hormone-binding globulin</li> <li>3-oxo-5-alpha-steroid 4-dehydrogenase 1</li> <li>3 beta-hydroxysteroid dehydrogenase/</li> <li>3-oxo-5-alpha-steroid 4-dehydrogenase 2</li> </ul>                         | None                                                     |
| 3    | ZINC3810860  | Ezetimibe<br>                                                                                  | 409.4                    | -9.7                       | <ul style="list-style-type: none"> <li>Niemann-Pick C1-like protein 1</li> <li>Cannabinoid receptor 1</li> </ul>                                                                                                                                       | Intestinal and biliary cholesterol absorption inhibition |
| 4    | ZINC22001688 | Pranlukast<br>                                                                                 | 481.5                    | -9.7                       | <ul style="list-style-type: none"> <li>Cysteinyl Leukotriene Receptor 1</li> <li>Cysteinyl Leukotriene Receptor 2</li> <li>3-oxoacyl-[acyl-carrier-protein] synthase 3</li> </ul>                                                                      | Antiallergic Anti-asthmatic                              |
| 5    | ZINC38140834 | Nifursol<br>                                                                                   | 365.2                    | -9.6                       | <ul style="list-style-type: none"> <li>Cytochrome P450 2C9</li> <li>Cytochrome P450 2C19</li> </ul>                                                                                                                                                    | Antibiotic Antiprotozoal                                 |
| 6-8  | ZINC22449528 | Zosuquidar<br>                                                                                 | 527.6                    | -9.5                       | <ul style="list-style-type: none"> <li>Beta-2 adrenergic receptor</li> <li>Peroxisomal acyl-coenzyme A oxidase 1</li> </ul>                                                                                                                            | Antineoplastic                                           |

| Rank | ZINC ID      | Name / Structure                                                                                    | Molecular Weight (g/mol) | Affinity energy (kcal/mol) | Target                                                                                                                                                                                                     | Indication                                                                                                  |
|------|--------------|-----------------------------------------------------------------------------------------------------|--------------------------|----------------------------|------------------------------------------------------------------------------------------------------------------------------------------------------------------------------------------------------------|-------------------------------------------------------------------------------------------------------------|
| 9-10 | ZINC29213660 | Fulvestrant<br>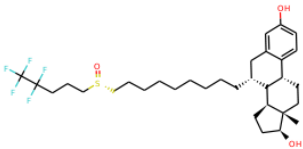    | 606.7                    | -9.5                       | <ul style="list-style-type: none"> <li>Androgen receptor</li> <li>Estrogen receptor beta</li> <li>Aldehyde oxidase</li> <li>Steroid hormone receptor ERR1</li> <li>Sex hormone-binding globulin</li> </ul> | Treatment of estrogen receptor+ or hormone-receptor positive advanced breast cancer in postmenopausal women |
| 11   | ZINC27641810 | Travaprost<br>     | 500.5                    | -8.9                       | <ul style="list-style-type: none"> <li>Prostaglandin E2 receptor EP1 subtype</li> <li>15-cis-phytoene desaturase</li> </ul>                                                                                | antiglaucoma, PG-EP agonist                                                                                 |
| 12   | ZINC03977803 | Diosmin<br>       | 608.5                    | -8.9                       | <ul style="list-style-type: none"> <li>Cytochrome P450 1A2</li> <li>Tumor necrosis factor</li> <li>Ribosomal protein S6 kinase alpha-3</li> <li>Interleukin-2</li> <li>Cytochrome P450 1A1</li> </ul>      | None                                                                                                        |
| 13   | ZINC03943903 | Baicalin<br>     | 445.3                    | -8.8                       | <ul style="list-style-type: none"> <li>Prolyl endopeptidase inhibitor</li> </ul>                                                                                                                           | Affects the GABA receptors, diuretic                                                                        |
| 14   | ZINC22010649 | Panobinostat<br> | 349.4                    | -8.8                       | <ul style="list-style-type: none"> <li>Histone Deacetylases</li> </ul>                                                                                                                                     | Epigenetic regulator, refractory multiple myeloma,                                                          |
| 15   | ZINC04468952 | Zucapsaicin<br>  | 305.4                    | -8.8                       | <ul style="list-style-type: none"> <li>Modulator of transient receptor potential cation channel subfamily V member 1</li> </ul>                                                                            | Topical analgesic used to treat osteoarthritis                                                              |
| 16   | ZINC01537619 | Preconaril<br>   | 381.3                    | -8.8                       | <ul style="list-style-type: none"> <li>Major capsid protein</li> <li>Prevents uncoating of the viral RNA genome.</li> </ul>                                                                                | Antiviral, picornaviridae infections, enteroviral sepsis syndrome                                           |

| Rank | ZINC ID      | Name / Structure                                                                                                                                                 | Molecular Weight (g/mol) | Affinity energy (kcal/mol) | Target                                                                                                                                             | Indication                                          |
|------|--------------|------------------------------------------------------------------------------------------------------------------------------------------------------------------|--------------------------|----------------------------|----------------------------------------------------------------------------------------------------------------------------------------------------|-----------------------------------------------------|
| 17   | ZINC05298979 | Fenleuton<br>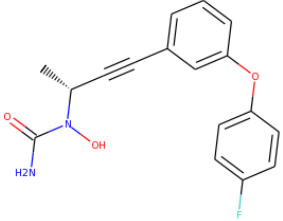                                                                   | 314.3                    | -8.8                       | <ul style="list-style-type: none"> <li>Arachidonate 5-lipoxygenase</li> <li>Inhibits leukotriene (LTB4, LTC4, LTD4, and LTE4) formation</li> </ul> | Chronic obstructive pulmonary disease               |
| 18   | ZINC06716957 | Nilotinib<br>                                                                   | 529.5                    | -8.8                       | <ul style="list-style-type: none"> <li>Tyrosine-protein kinase</li> </ul>                                                                          | Chronic myeloid leukemia                            |
| 19   | ZINC03975663 | Merimepodib<br>                                                                 | 452.4                    | -8.7                       | <ul style="list-style-type: none"> <li>Inosine-5'-monophosphate dehydrogenase 1</li> </ul>                                                         | Anticancer, immunosuppressive and antiviral therapy |
| 20   | ZINC13493184 | (2E)-N-hydroxy-3-[1-methyl-4-(phenylacetyl)-1H-pyrrol-2-yl]prop-2-enamide<br> | 284.3                    |                            | <ul style="list-style-type: none"> <li>Histone deacetylases</li> </ul>                                                                             | Epigenetic regulator                                |

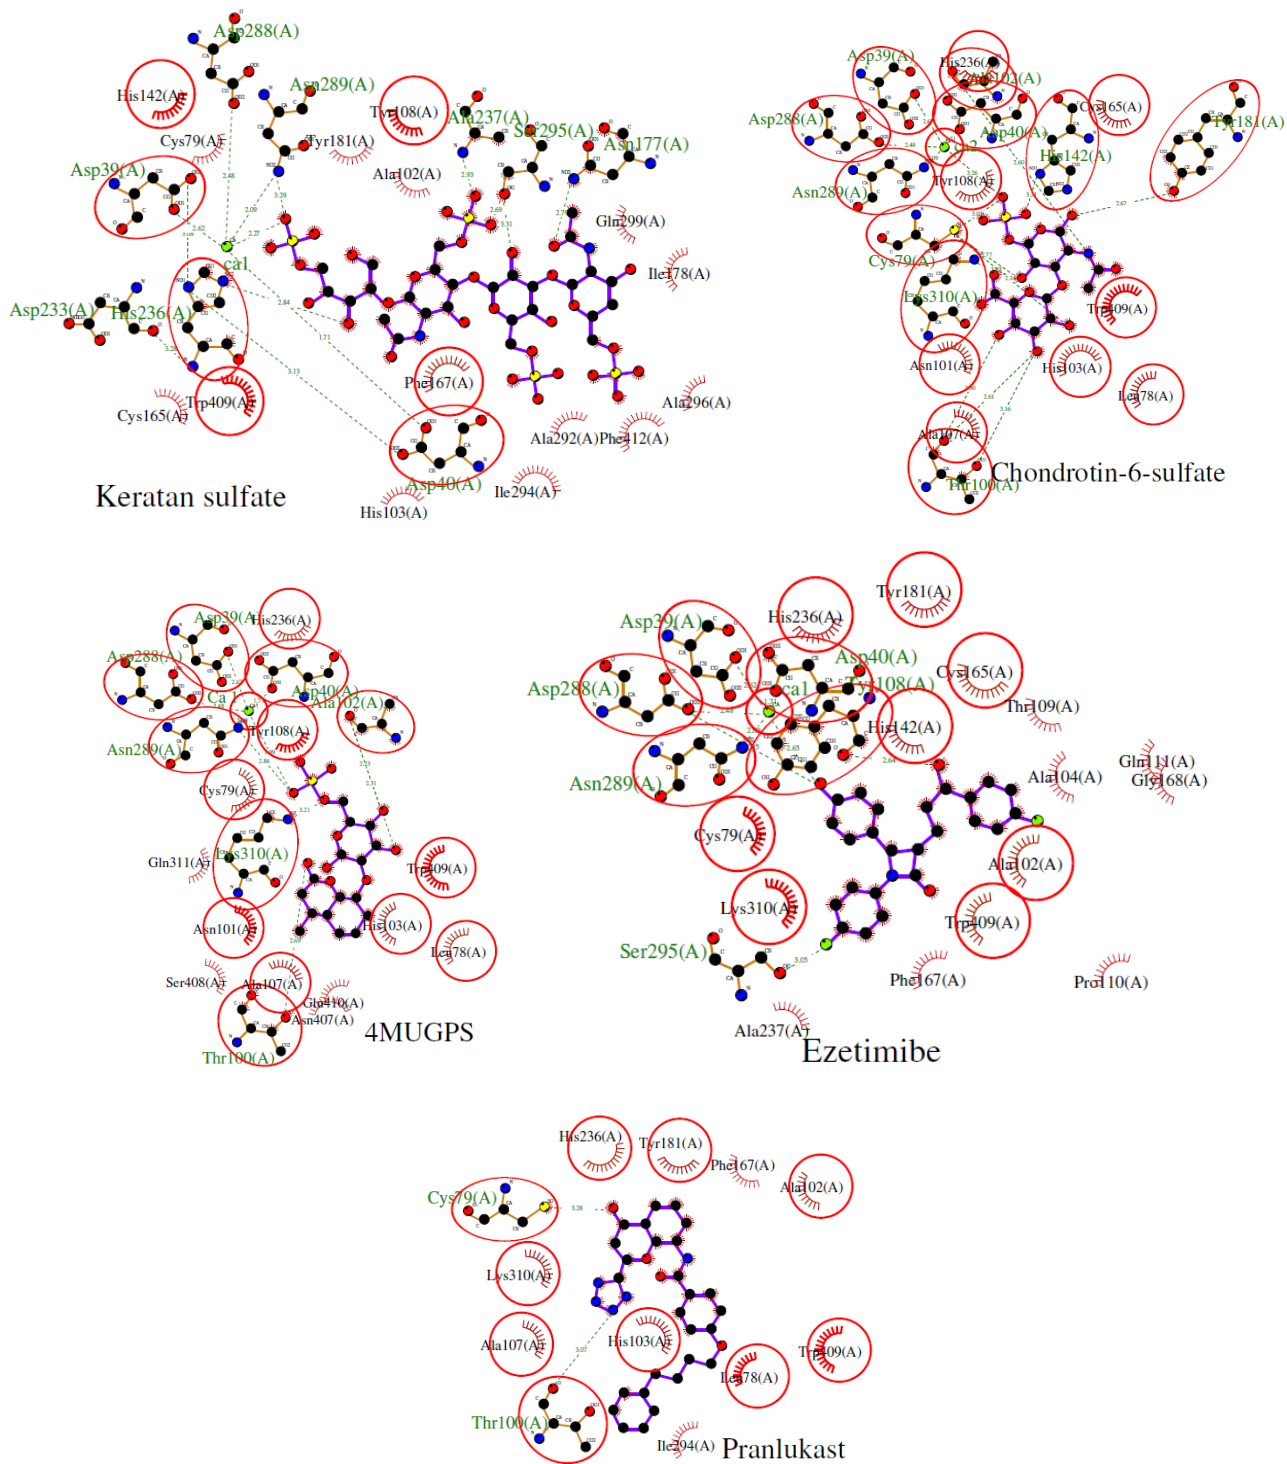

**Figure S1.** Protein-ligand interactions between human GALNS, keratan sulfate, chondroitin-6-sulfate, 4-methylumbelliferyl- $\beta$ -d-galactopyranoside-6-sulfate (4MUGPS), ezetimibe, and pramlukast. Circle residues correspond to conserved interactions among all the ligands. Green and black residues are residues interacting through hydrogen bond and hydrophobic interactions, respectively.

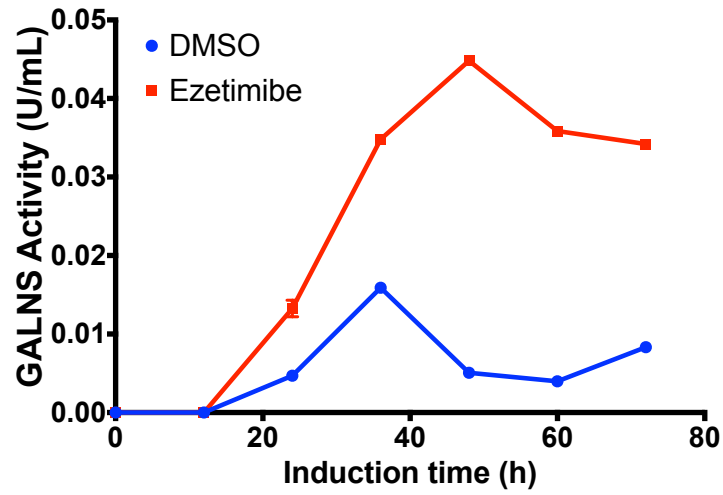

**Figure S2.** Production of recombinant GALNS in *P. pastoris* at bioreactor scale (1.7 L). Human recombinant GALNS was produced with or without supplementation with ezetimibe 0.001  $\mu$ M. GALNS activity was measured in the extracellular fraction.
